# Supplementary material for: Prefab Hollow Glass Microsphere-Based Immunosensor with Liquid Crystal Sensitization for Acute Myocardial Infarction Biomarker Detection
Source: MDPI journal article supplement (doi:10.3390/bios12070439), 2022-06-22
Supplement: s1 [file s1]

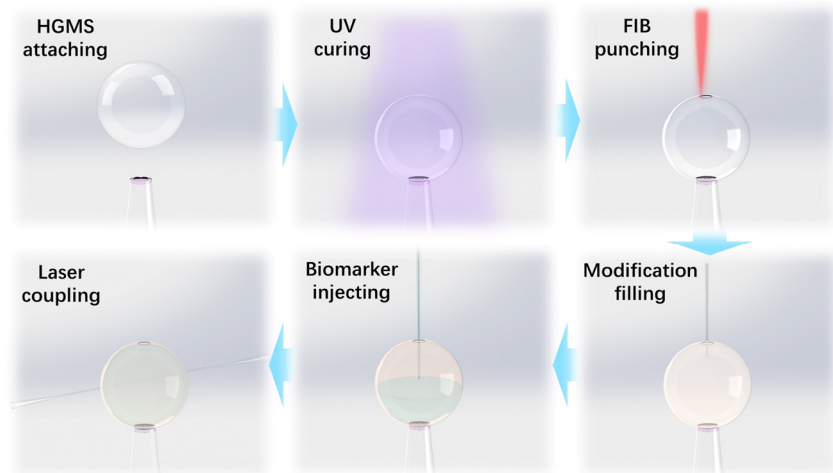

**Figure S1.** Illustration of the manufacturing process of the immunosensor.

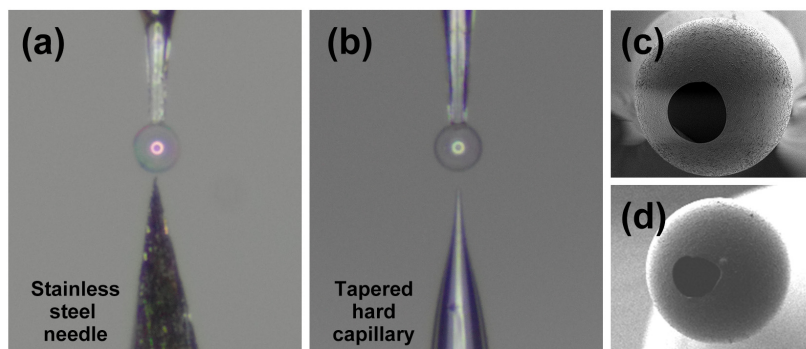

**Figure S2.** Economical perforating methods by using (a) stainless steel needle or (b) tapered hard capillary. (c,d) SEM images of the HGMSs perforated by economical methods.

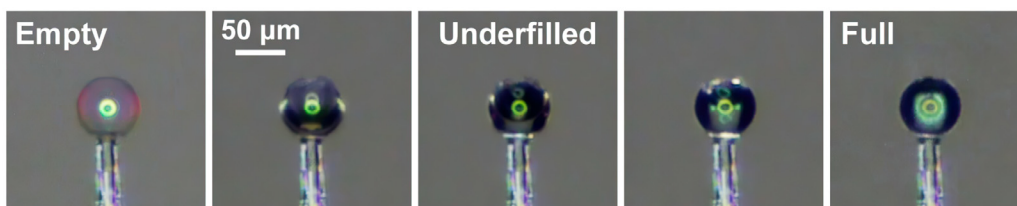

**Figure S3.** Optical microscopic images of the HGMS with different filling states.

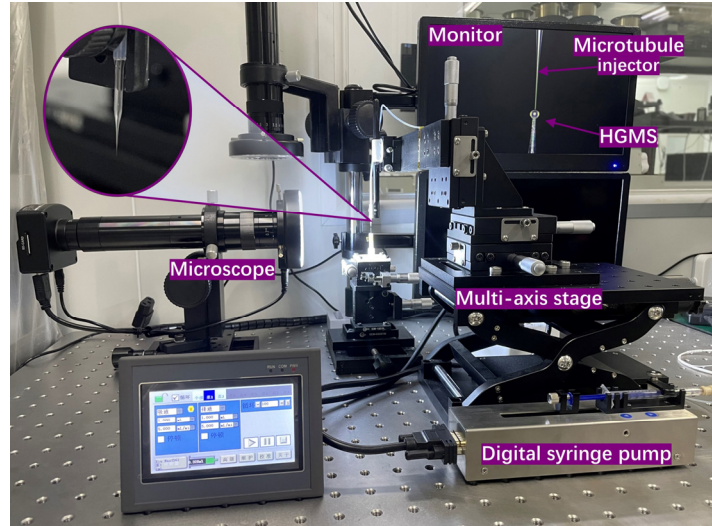

**Figure S4.** Microtube injector assisted with digital syringe pump.

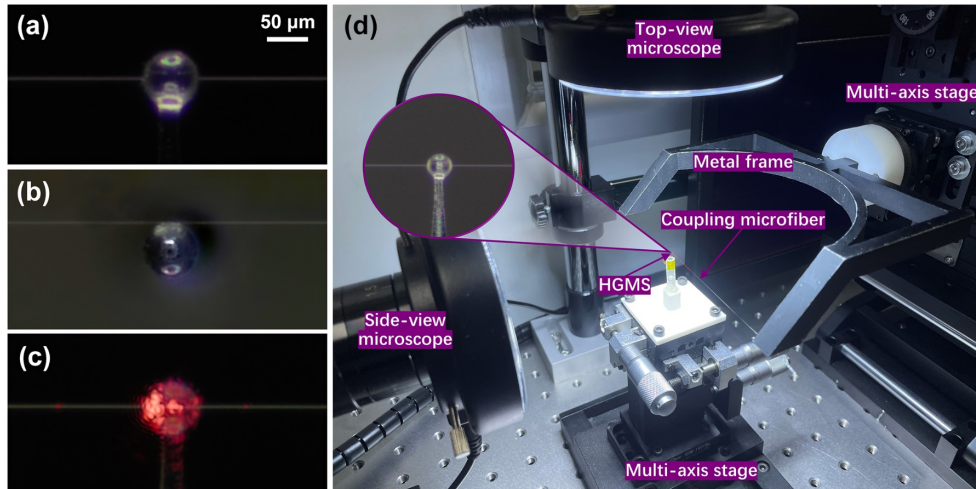

**Figure S5.** Optical microscopic images of the HGMS coupled with microfiber in (a) side and (b) top views, (c) indicated with red-laser. (d) Photo of the coupling platform for the HGMS microcavity with microfiber.

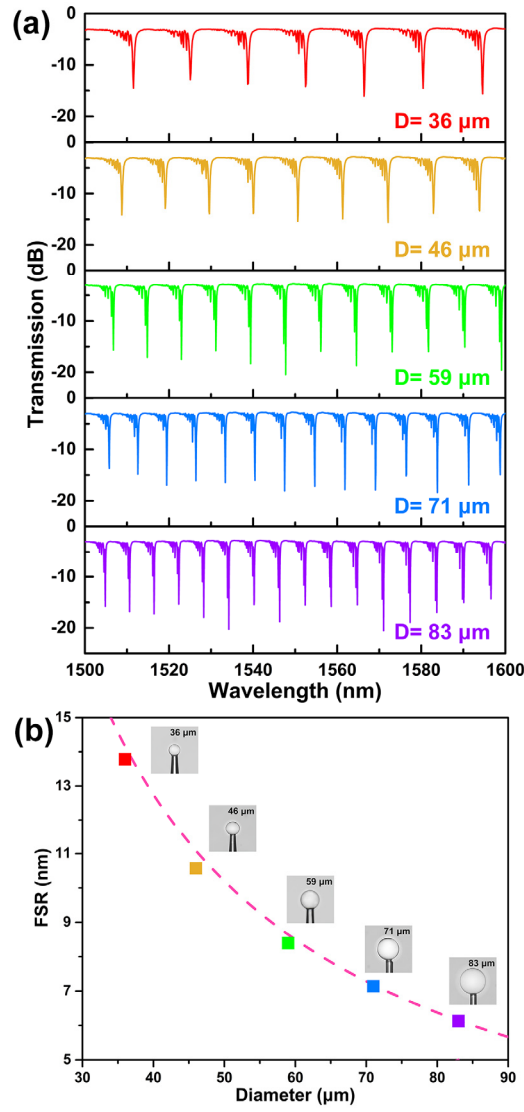

**Figure S6.** (a) WGM spectra with different FSRs in different diameters HGMSs. (b) Relationship between the FSR and the diameter of HGMS.

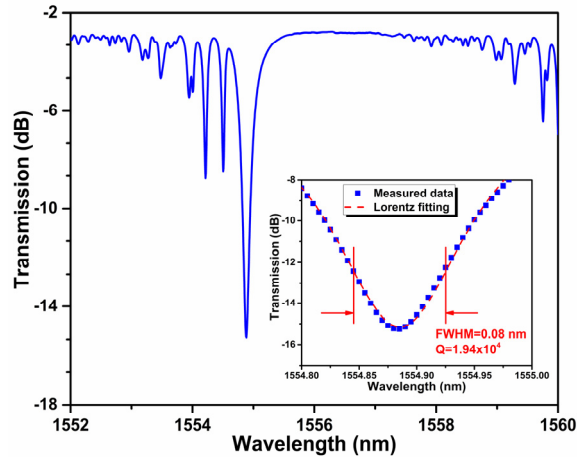

**Figure S7.** Spectrum of the WGM on the unmodified HGMS with a high Q factor of  $1.94 \times 10^4$  and a FWHM of 0.08 nm.

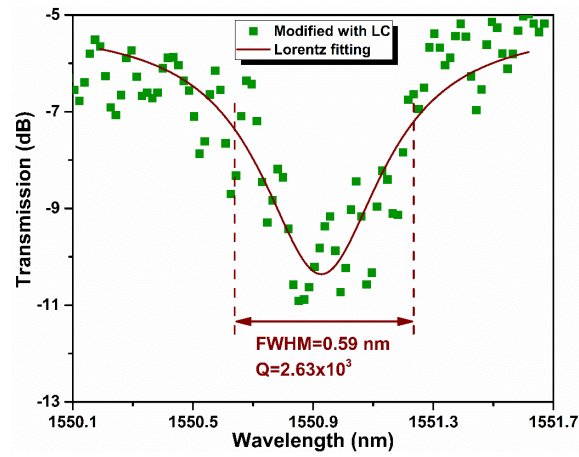

**Figure S8.** Spectrum of the WGM on the LC-modified HGMS with a Q factor of  $2.63 \times 10^4$  and a FWHM of 0.59 nm.

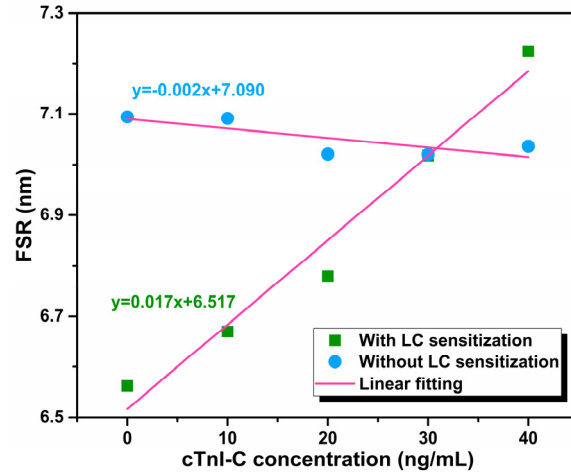

**Figure S9.** FSR changes of the HGMSs with and without LC sensitization in different cTnI-C concentrations.

**Table S1.** A comprehensive comparison between the proposed LC-sensitization and the reported cTnI immunosensors.

| Sensing element            | Sensing element size (mm) | Sensitivity (nm/(ng/mL)) | Resolution** (ng/mL)    | LOD (ng/mL)        | Concentration n range (ng/mL) | System configuration n | Features              | Ref. |
|----------------------------|---------------------------|--------------------------|-------------------------|--------------------|-------------------------------|------------------------|-----------------------|------|
| LSPR multimode fiber       | >1000                     | $3.4 \times 10^{-3}$     | 0.29                    | 96.26              | 0~1000                        | Simple                 | Nanomaterials assist  | [14] |
| Optical microfiber coupler | >1000                     | 900*                     | $1.11 \times 10^{-6}$ * | $2 \times 10^{-3}$ | 0~0.01                        | Simple                 | Ultrahigh sensitivity | [15] |
| Phase-shifted              | 3                         | 0.1*                     | 0.01*                   | 0.03               | 0~100                         | Simple                 | Reflection-           | [16] |

|                  |       |       |                       |       |        |         |                                       |           |
|------------------|-------|-------|-----------------------|-------|--------|---------|---------------------------------------|-----------|
| mFBG             |       |       |                       |       |        |         | type                                  |           |
| Harmonic mFBG    | 4     | 0.01* | 0.1*                  | 13.5  | 0~1000 | Simple  | Temperature compensation              | [17]      |
| Microtubule      | ~2000 | 6.759 | $1.48 \times 10^{-4}$ | 0.137 | 0~0.55 | Complex | Microfluidic tube, optofluidic lasing | [34,35]   |
| WGM probe        | 1.2   | 1.637 | $6.11 \times 10^{-4}$ | 0.59  | 0~2.0  | Complex | ultrahigh resolution                  | [36]      |
| LC-modified HGMS | ~0.07 | 0.175 | $5.71 \times 10^{-3}$ | 1.103 | 0~40   | Simple  | Ultralow consumption                  | This work |

---

\*The calculation results were estimated according to the optimal data in the references.

\*\*At the same optical wavelength resolution of 1 pm.
